# Supplementary material
Source: MDPI journal article supplement (https://www.mdpi.com/2073-4344/11/8/879)
Supplement: s1 [file s1]

# Biocatalytic Silylation: The Condensation of Phenols and Alcohols with Triethylsilanol.

Emily I. Sparkes <sup>1,2</sup>, Chisom S. Egedezu <sup>1,2</sup>, Billie Lias <sup>1,2</sup>, Rehana Sung <sup>1</sup>, Stephanie A. Caslin <sup>1,2</sup>, S. Yasin Tabatabaei Dakhili <sup>1,2</sup>, Peter G. Taylor <sup>3</sup>, Peter Quayle <sup>2</sup> and Lu Shin Wong <sup>1,2,\*</sup>

<sup>1</sup> Manchester Institute of Biotechnology, University of Manchester, 131 Princess Street, Manchester M1 7DN, UK; emilysparkes11@gmail.com (E.I.S.); chisom.egedezu@manchester.ac.uk (C.S.E.); billie.lias@student.manchester.ac.uk (B.L.); rehana.sung@manchester.ac.uk (R.S.); stephanie.caslin@sky.com (S.A.C.); s.yasin.tabatabaei.d@gmail.com (S.Y.T.D.)

<sup>2</sup> Department of Chemistry, University of Manchester, Oxford Road, Manchester M13 9PL, UK; Peter.Quayle@manchester.ac.uk

<sup>3</sup> Faculty of Science, Technology, Engineering and Mathematics, Open University, Walton Hall, Milton, Keynes MK7 6AA, UK; peter.taylor@open.ac.uk

\* Correspondence: l.s.wong@manchester.ac.uk

Supplementary Results Page 2

GC Calibration Plots for Product Quantification Page 4

Synthetic Procedures for the Preparation of Product Standards Page 10

## Supplementary Results

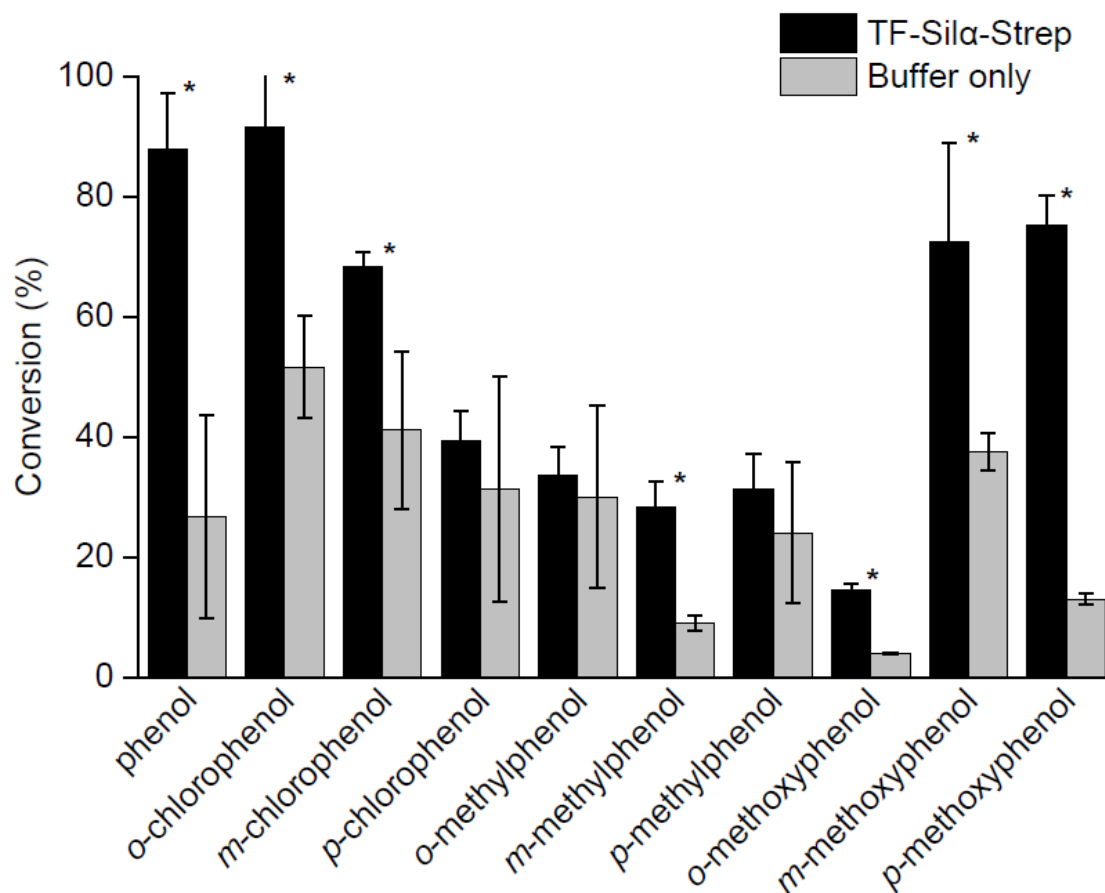

**Figure S1.** Graph of percentage conversions of phenols to the corresponding silyl ethers after 72 hours. This graph contains the same data as Figure 1 but grouped by type of substitution. The error bars indicate standard deviations. A one-tailed Student's t-test assuming unequal variance was performed, comparing each enzyme to its control. Comparisons resulting in a  $p < 0.05$  were deemed to be significant and marked with \*.

**Table S1.** Percentage conversion, net enzymatic conversion and conversion enhancement for the condensation of aromatic alcohols and triethylsilanol after 72 h. The limit of quantification (LOQ) in all cases were defined as 8 times the standard deviation of the blanks ( $n = 5$ ), divided by the slope of the calibration curve. All results presented here are within the LOQ, with an estimated instrumental error of ~ 0.1% conversion.

| Substrate               | Enzymatic reaction conversion (%) | Control reaction conversion (%) | Net enzymatic conversion (%) <sup>a</sup> | Fold-increase in conversion <sup>b</sup> |
|-------------------------|-----------------------------------|---------------------------------|-------------------------------------------|------------------------------------------|
| Phenol                  | 88                                | 27                              | 61                                        | 3.3                                      |
| <i>o</i> -chlorophenol  | 91                                | 52                              | 40                                        | 1.8                                      |
| <i>m</i> -chlorophenol  | 68                                | 41                              | 27                                        | 1.7                                      |
| <i>p</i> -chlorophenol  | 39                                | 31                              | 8                                         | 1.3                                      |
| <i>o</i> -methylphenol  | 34                                | 30                              | 4                                         | 1.1                                      |
| <i>m</i> -methylphenol  | 28                                | 9                               | 19                                        | 3.2                                      |
| <i>p</i> -methylphenol  | 31                                | 24                              | 7                                         | 1.3                                      |
| <i>o</i> -methoxyphenol | 15                                | 4                               | 11                                        | 3.7                                      |
| <i>m</i> -methoxyphenol | 72                                | 37                              | 35                                        | 1.9                                      |

|                           |     |       |      |      |
|---------------------------|-----|-------|------|------|
| <i>p</i> -methoxyphenol   | 75  | 13    | 62   | 5.8  |
| 1-octanol                 | 0.8 | 0.8   | -    | -    |
| 1-octanol (after 192 h)   | 2.7 | 4.0   | -    | -    |
| 3-penten-2-ol             | 0.3 | 0.7   | -    | -    |
| <i>R</i> -2-octanol       | 0.9 | 0.1   | 0.8  | 6.3  |
| <i>S</i> -2-octanol       | 1.9 | < 0.1 | 1.9  | 38.8 |
| <i>R</i> -2-phenylethanol | 2.3 | 0.1   | 2.2  | 25.6 |
| <i>S</i> -2-phenylethanol | 3.4 | 0.2   | 3.23 | 20   |

<sup>a</sup> Net enzymatic conversion calculated as percentage conversion of the enzymatic reaction minus percentage conversion of the control reaction.

<sup>b</sup> Fold increase calculated as the percentage conversion of the enzymatic reaction divided by the percentage conversion of the control reaction.

**Table S2.** Percentage conversion, net enzymatic conversion, and conversion enhancement for the condensation of *m*-methoxyphenol and triethylsilanol in various solvents after 72 h. The limit of quantification (LOQ) in all cases were defined as 8 times the standard deviation of the blanks (*n* = 5), divided by the slope of the calibration curve. All results presented here are within the LOQ, with an estimated instrumental error of ~ 0.1% conversion.

| Solvent           | Normalised polarity, <i>ETN</i> | Enzymatic Conversion (%) | Control Conversion (%) | Net Enzymatic Conversion (%) | Fold-increase in conversion <sup>b</sup> |
|-------------------|---------------------------------|--------------------------|------------------------|------------------------------|------------------------------------------|
| Ethyl acetate     | 0.228                           | 33                       | 38                     | -                            | -                                        |
| Tetrahydrofuran   | 0.207                           | 12                       | 15                     | -                            | -                                        |
| 1,4-dioxane       | 0.164                           | 16                       | 17                     | -                            | -                                        |
| Diisopropyl ether | 0.105                           | 28                       | 27                     | 1a                           | -                                        |
| Toluene           | 0.099                           | 76                       | 36                     | 40                           | 2.1                                      |
| <i>n</i> -Octane  | 0.012                           | 74                       | 35                     | 3                            | 2.1                                      |

<sup>a</sup> Not statistically significant, see Figure 3.

<sup>b</sup> Fold increase calculated as the percentage conversion of the enzymatic reaction divided by the percentage conversion of the control reaction.

**Table S3.** Percentage conversion, net enzymatic conversion and conversion enhancement for the condensation of *m*-methoxyphenol and triethylsilanol in various mixtures of 1,4-dioxane and *n*-octane.

| % <i>v/v</i> of 1,4-dioxane | Enzymatic Conversion (%) | Control Conversion (%) | Net Enzymatic Conversion (%) | Fold-increase in conversion <sup>a</sup> |
|-----------------------------|--------------------------|------------------------|------------------------------|------------------------------------------|
| 0                           | 74                       | 35                     | 39                           | 2.1                                      |
| 10                          | 81                       | 52                     | 29                           | 1.6                                      |
| 20                          | 61                       | 49                     | 12                           | 1.2                                      |
| 30                          | 38                       | 41                     | -                            | -                                        |

<sup>a</sup> Fold increase calculated as the percentage conversion of the enzymatic reaction divided by the percentage conversion of the control reaction.

### GC Calibration Plots for Product Quantification

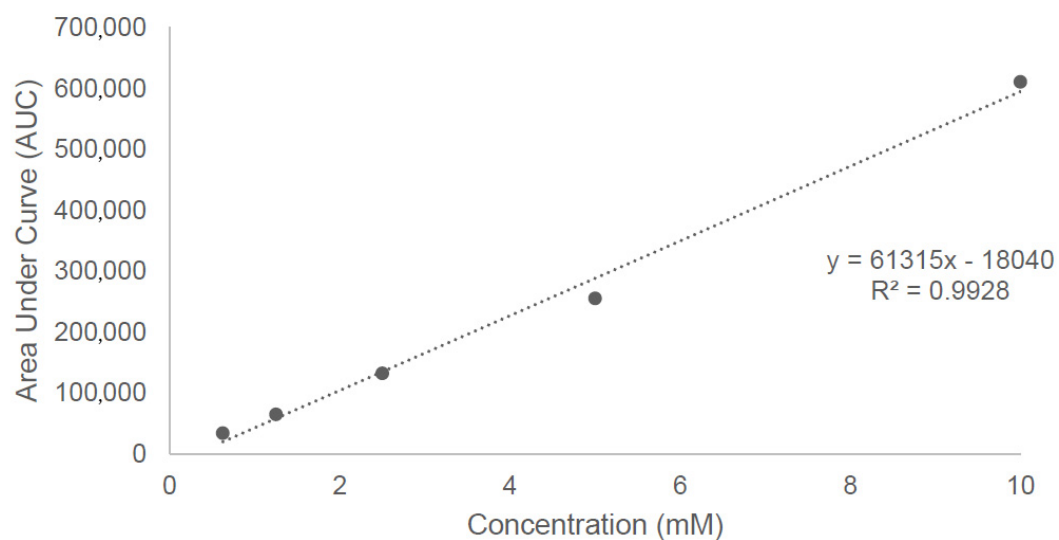

**Figure S2.** A calibration graph of area under the peak corresponding to silyl ether (triethyl(phenoxy)silane) in the GCMS trace against concentration.

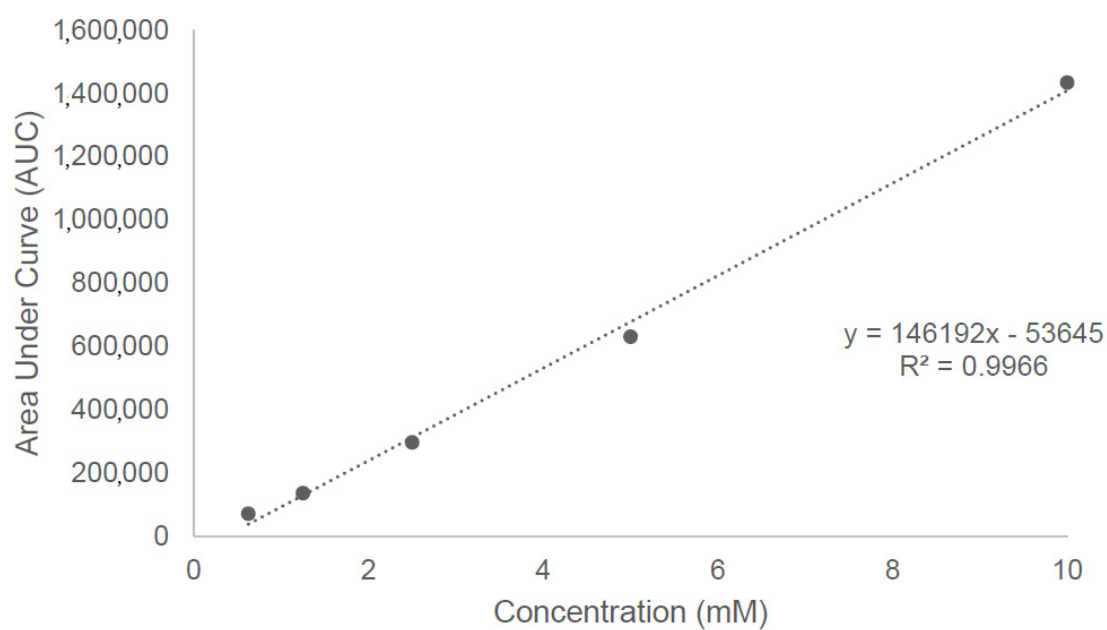

**Figure S3.** A calibration graph of area under the peak corresponding to silyl ether (triethyl(o-methoxyphenoxy)silane) in the GCMS trace against concentration.

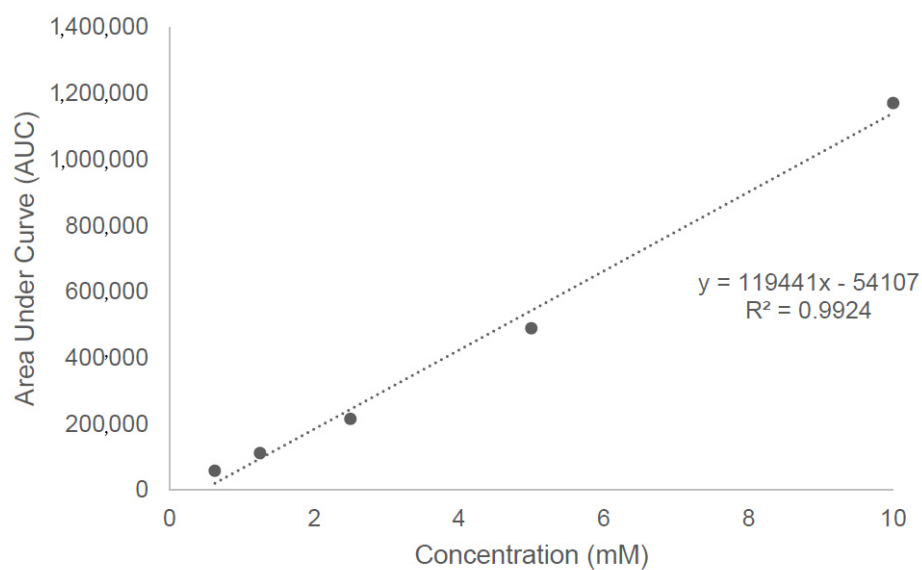

**Figure S4.** A calibration graph of area under the peak corresponding to silyl ether (triethyl(*m*-methoxyphenoxy)silane) in the GCMS trace against concentration.

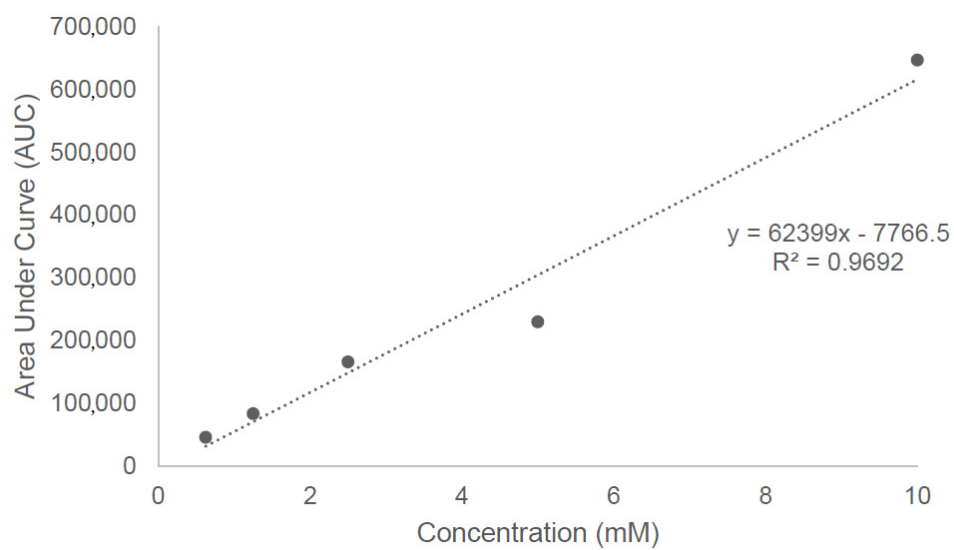

**Figure S5.** A calibration graph of area under the peak corresponding to silyl ether (triethyl(*p*-methoxyphenoxy)silane) in the GCMS trace against concentration.

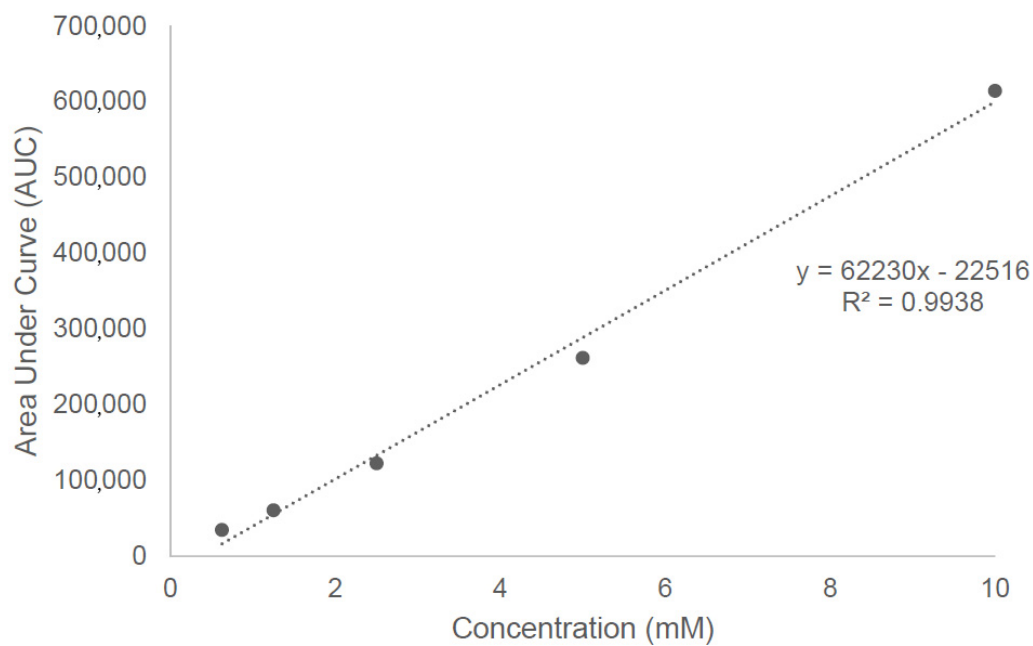

**Figure S6.** A calibration graph of area under the peak corresponding to silyl ether (triethyl(*o*-methylphenoxy)silane) in the GCMS trace against concentration.

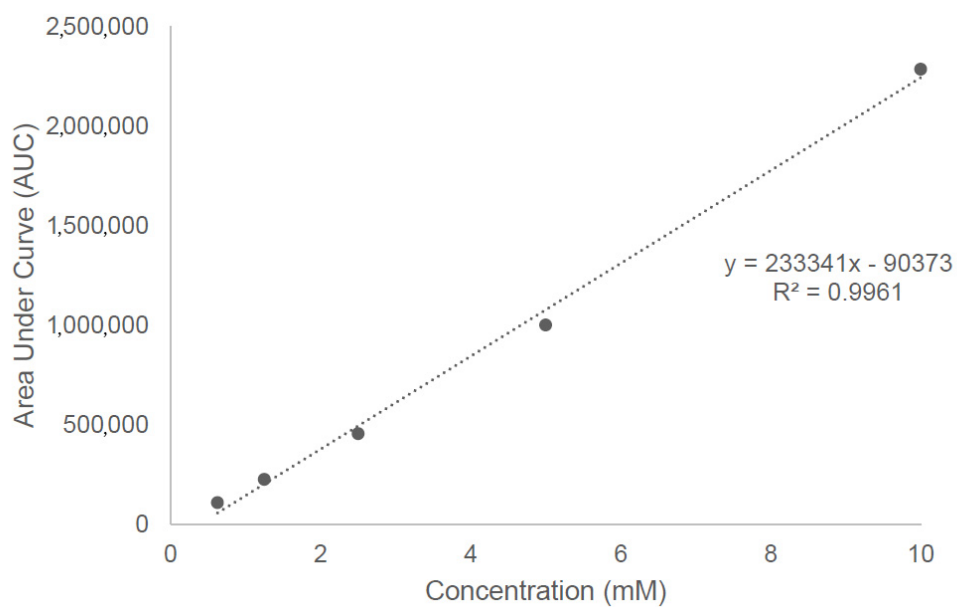

**Figure S7.** A calibration graph of area under the peak corresponding to silyl ether (triethyl(*m*-methylphenoxy)silane) in the GCMS trace against concentration.

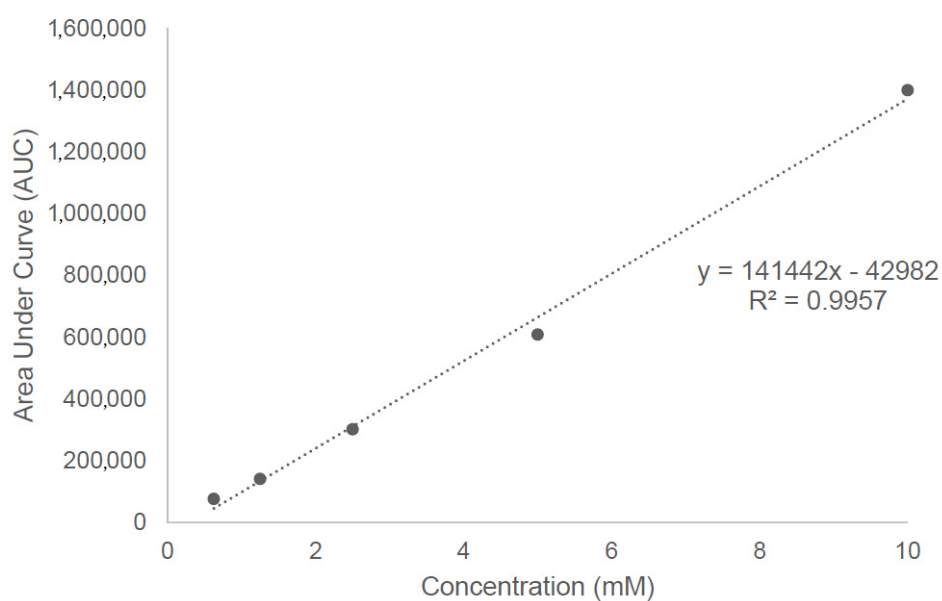

**Figure S8.** A calibration graph of area under the peak corresponding to silyl ether (triethyl(*p*-methylphenoxy)silane) in the GCMS trace against concentration.

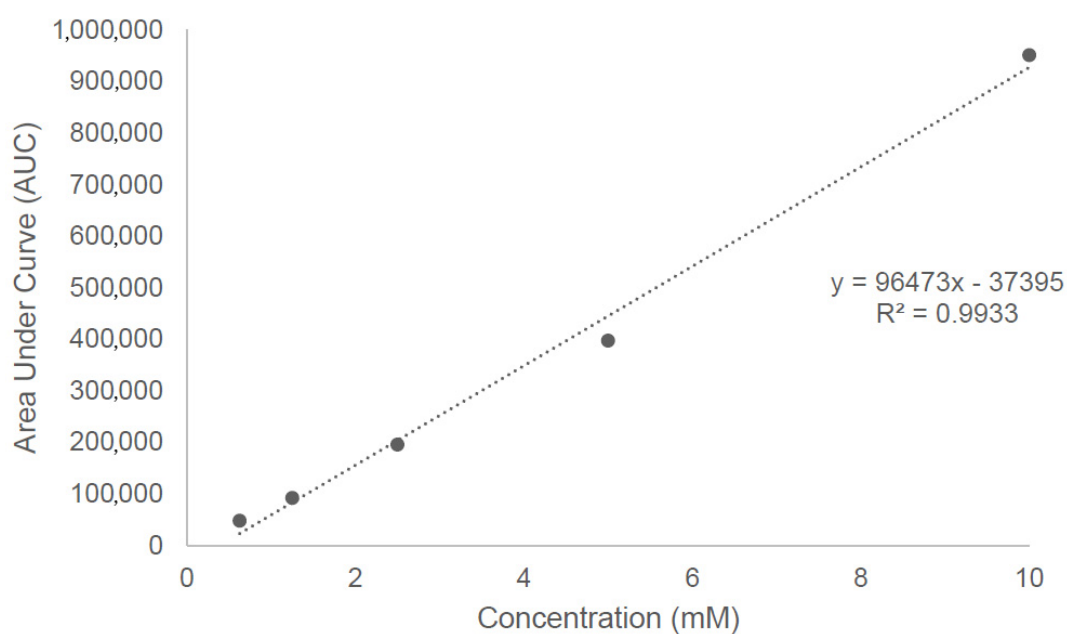

**Figure S9.** A calibration graph of area under the peak corresponding to silyl ether (triethyl(*o*-chlorophenoxy)silane) in the GCMS trace against concentration.

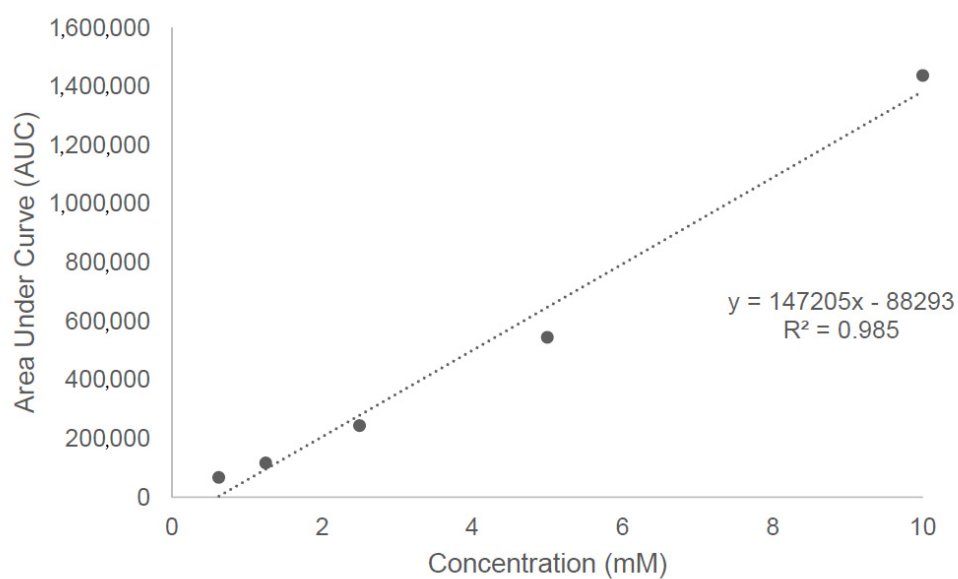

**Figure S10.** A calibration graph of area under the peak corresponding to silyl ether (triethyl(*m*-chlorophenoxy)silane) in the GCMS trace against concentration.

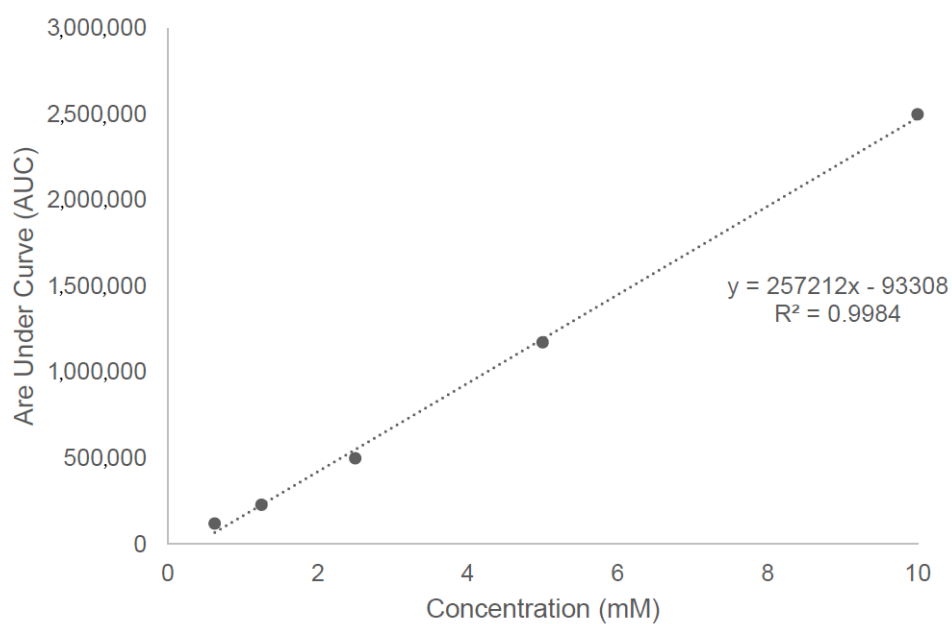

**Figure S11.** A calibration graph of area under the peak corresponding to silyl ether (triethyl(*p*-chlorophenoxy)silane) in the GCMS trace against concentration.



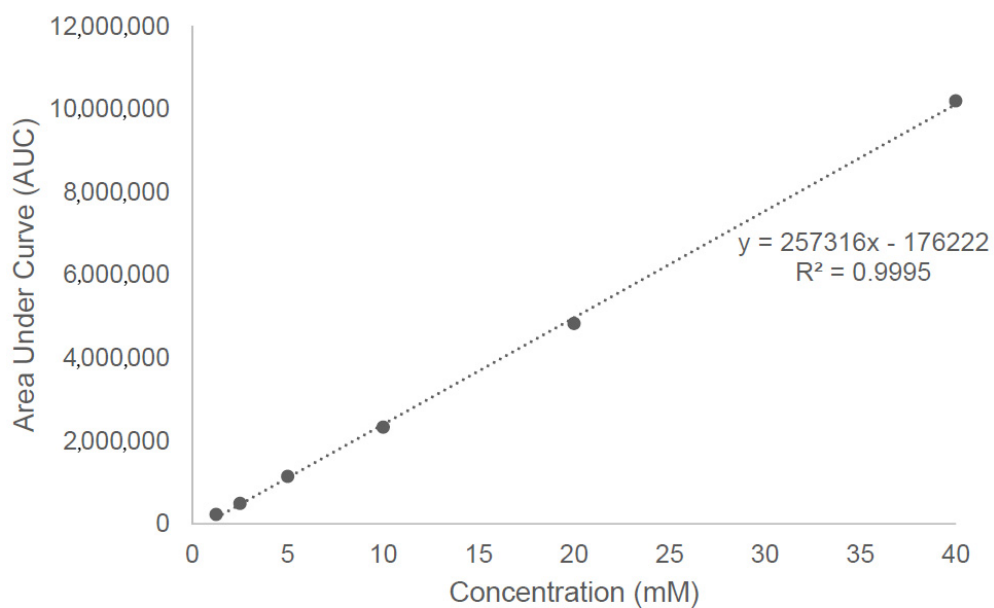

**Figure S12.** A calibration graph of area under the peak corresponding to silyl ether (triethyl(octyloxy)silane) in the GCMS trace against concentration.

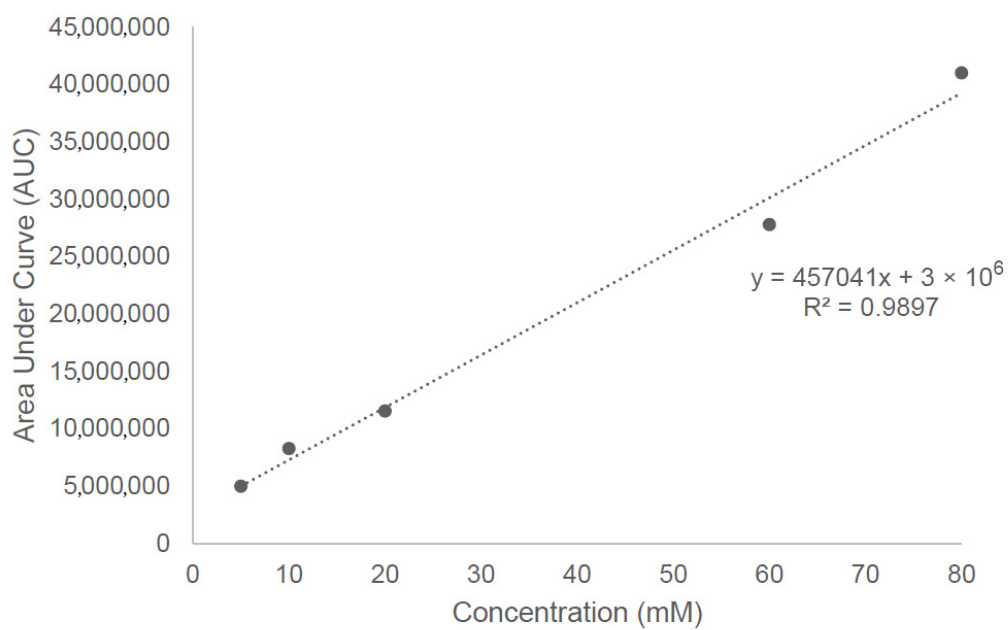

**Figure S13.** A calibration graph of area under the peak corresponding to silyl ether (triethyl(E-pent-3-en-2-yloxy)silane) in the GCMS trace against concentration.

## Synthetic Procedures for the Preparation of Product Standards

**Triethyl(phenoxy)silane** <sup>1</sup>. Chlorotriethylsilane (1.2 mL, 7.1 mmol) was added dropwise to a solution of phenol (559 mg, 6.0 mmol) and imidazole (1000 mg, 14.7 mmol) in anhydrous DMF (6 mL). The reaction mixture was stirred at room temperature for 24 h, after which diethyl ether (150 mL) was added and the organic phase washed with H<sub>2</sub>O (2 × 60 mL). The organic phase was then dried with MgSO<sub>4</sub> and concentrated under reduced pressure. The residue was purified by flash chromatography with silica gel using the eluent noted below to yield the desired compound as a colourless oil (742 mg, 60 %); R<sub>f</sub> 0.52 (EtOAc:hexane, 1:30);  $\nu_{\max}$  (liquid)/cm<sup>-1</sup> 2953 (Ar C-H), 2875 (C-H), 1595 (Ar C=C), 1258, 1002, 972 (SiCH<sub>2</sub>CH<sub>3</sub>), 1235 (SiOAr);  $\delta$ H (400 MHz, CDCl<sub>3</sub>) 0.71 – 0.77 (q, 6H, SiCH<sub>2</sub>CH<sub>3</sub>), 0.99 (t, *J* = 8.0 Hz, 9H, SiCH<sub>2</sub>CH<sub>3</sub>), 6.84 – 6.87 (dd, *J* = 8.60, 1.0 Hz, 2H), 6.93 – 6.96 (m, 1H, ArH), 7.20 – 7.24 (m, 2H, ArH); MS *m/z* (ES<sup>+</sup>) 209 (100 %, [M+H]<sup>+</sup>).

**Triethyl(*o*-chlorophenoxy)silane** <sup>2</sup>. Chlorotriethylsilane (1.2 mL, 7.1 mmol) was added dropwise to a solution of *o*-chlorophenol (765 mg, 6.0 mmol) and imidazole (1000 mg, 14.7 mmol) in anhydrous DMF (6 mL). The reaction mixture was stirred at room temperature for 24 h, after which diethyl ether (150 mL) was added and the organic phase washed with H<sub>2</sub>O (2 × 60 mL). The organic phase was then dried with MgSO<sub>4</sub> and concentrated under reduced pressure. The residue was purified by flash chromatography with silica gel using the eluent noted below to yield the desired compound as a colourless oil (560 mg, 38 %); R<sub>f</sub> 0.40 (hexane);  $\nu_{\max}$  (liquid)/cm<sup>-1</sup> 2955 (Ar C-H), 2876 (C-H), 1585 (Ar C=C), 1245, 1004 (SiCH<sub>2</sub>CH<sub>3</sub>), 1245 (SiOAr) 745 (C-Cl);  $\delta$ H (400 MHz, CDCl<sub>3</sub>) 0.75 – 0.81 (q, 6H, SiCH<sub>2</sub>CH<sub>3</sub>), 0.99 – 1.03 (t, *J* = 8.0 Hz, 9H, SiCH<sub>2</sub>CH<sub>3</sub>), 6.86 – 6.89 (m, 2H, ArH), 7.09 – 7.13 (m, 1H, ArH), 7.32 – 7.34 (dd, *J* = 8.2, 1.8 Hz, 1H, ArH); MS *m/z* (EI<sup>+</sup>) 242 (100 %, M<sup>+</sup> for <sup>35</sup>Cl isotopologue), 244 (35 %, M<sup>+</sup> for <sup>37</sup>Cl isotopologue).

**Triethyl(*m*-chlorophenoxy)silane** <sup>2</sup>. Chlorotriethylsilane (1 mL, 6.0 mmol) was added dropwise to a solution of *m*-chlorophenol (940  $\mu$ L, 5.8 mmol) and imidazole (800 mg, 11.8 mmol) in anhydrous DMF (5 mL). The reaction mixture was stirred at room temperature for 16 h, after which diethyl ether (150 mL) was added and the organic phase washed with H<sub>2</sub>O (2 × 60 mL). The organic phase was then dried with MgSO<sub>4</sub> and concentrated under reduced pressure. The residue was purified by silica gel using the eluent noted below to yield the desired compound as a colourless oil (650 mg, 45 %); R<sub>f</sub> 0.56 (hexane);  $\nu_{\max}$  (liquid)/cm<sup>-1</sup> 2956 (Ar C-H), 2910, 1590 (Ar C=C), 1239, 999, 937 (SiCH<sub>2</sub>CH<sub>3</sub>), 1239, 973 (SiOAr), 770, 744, 682 (C-Cl);  $\delta$ H (100 MHz, CDCl<sub>3</sub>) 0.71 – 0.77 (q, 6H, SiCH<sub>2</sub>CH<sub>3</sub>), 0.98 – 1.02 (t, *J* = 7.8 Hz, 9H, SiCH<sub>2</sub>CH<sub>3</sub>), 6.72 – 6.74 (ddd, *J* = 8.0, 1.6 Hz, 1H, ArH), 6.85 (t, *J* = 2.2 Hz, 1H, ArH), 6.92 – 6.94 (ddd, *J* = 8.0, 1.6 Hz, 1H, ArH), 7.14 (t, *J* = 8.2 Hz, 1H); MS *m/z* (EI<sup>+</sup>) 242 (100 %, M<sup>+</sup> for <sup>35</sup>Cl isotopologue), 244 (35 %, M<sup>+</sup> for <sup>37</sup>Cl isotopologue).

**Triethyl(*p*-chlorophenoxy)silane** <sup>2</sup>. Chlorotriethylsilane (1 mL, 5.8 mmol) was added dropwise to a solution of *p*-chlorophenol (940  $\mu$ L, 5.8 mmol) and imidazole (800 mg, 11.8 mmol) in anhydrous DMF (5 mL). The reaction mixture was stirred at room temperature for 20 h, after which diethyl ether (60 mL) was added and the organic phase washed with H<sub>2</sub>O (2 × 60 mL). The organic phase was then dried with MgSO<sub>4</sub> and concentrated under reduced pressure. The residue was purified by silica gel using the eluent noted below to yield the desired **14** as a colourless oil (710 mg, 49 %); R<sub>f</sub> 0.42 (hexane);  $\nu_{\max}$  (liquid)/cm<sup>-1</sup> 2955 (Ar C-H), 2955, 1592 (Ar C=C), 1259, 1005 (SiCH<sub>2</sub>CH<sub>3</sub>), 1259, 1005 (SiOAr), 829, 748 (C-Cl);  $\delta$ H (400 MHz, CDCl<sub>3</sub>) 0.69 – 0.76 (q, 6H, SiCH<sub>2</sub>CH<sub>3</sub>), 0.99 (t, *J* = 8.0 Hz, 9H, SiCH<sub>2</sub>CH<sub>3</sub>), 6.76 – 6.78 (m, 2H, ArH), 7.16 – 7.18 (m, 2H, ArH); MS *m/z* (EI<sup>+</sup>) 242 (100 %, M<sup>+</sup> for <sup>35</sup>Cl isotopologue), 244 (35 %, M<sup>+</sup> for <sup>37</sup>Cl isotopologue).

**Triethyl(*o*-methylphenoxy)silane** <sup>2</sup>. Chlorotriethylsilane (1 mL, 6.0 mmol) was added dropwise to a solution of *o*-cresol (643 mg, 6.0 mmol) and imidazole (811 mg, 11.8 mmol) in anhydrous acetonitrile (6 mL). The reaction mixture was stirred at room temperature for 16 h, after which diethyl ether (20 mL) was added and the organic phase washed with H<sub>2</sub>O (2 × 20 mL). The organic phase was then dried with MgSO<sub>4</sub> and concentrated under reduced pressure. The residue was purified by silica gel using the eluent noted below to yield the desired product as a colourless oil (438 mg, 33 %); R<sub>f</sub> 0.64 (EtOAc:hexane, 9:1);  $\nu_{\text{max}}$  (liquid)/cm<sup>-1</sup> 2954 (Ar C-H), 2910, 2876 (C-H), 1601 (Ar C=C), 1259, 1002, 915 (SiCH<sub>2</sub>CH<sub>3</sub>), 1236, 1002 (SiOAr);  $\delta$ H (400 MHz, CDCl<sub>3</sub>) 0.73 – 0.79 (m, 6 H, SiCH<sub>2</sub>CH<sub>3</sub>) 0.98 – 1.02 (m, *J* = 8.0, 9 H, SiCH<sub>2</sub>CH<sub>3</sub>) 2.21 (s, 3 H, ArCH<sub>3</sub>) 6.76 – 6.78 (m, 1 H, ArH) 6.83 – 6.86 (m, 1 H, ArH) 7.03 – 7.06 (m, 1 H, ArH) 7.11 – 7.13 (dd, *J* = 7.6 Hz, 1 H, ArH); MS *m/z* (ES<sup>+</sup>) 223 (100 %, [M+H]<sup>+</sup>).

**Triethyl(*m*-methylphenoxy)silane** <sup>2</sup>. Chlorotriethylsilane (1 mL, 6.0 mmol) was added dropwise to a solution of *o*-cresol (643 mg, 6.0 mmol) and imidazole (811 mg, 11.8 mmol) in anhydrous acetonitrile (6 mL). The reaction mixture was stirred at room temperature for 16 h, after which diethyl ether (20 mL) was added and the organic phase washed with H<sub>2</sub>O (2 × 20 mL). The organic phase was then dried with MgSO<sub>4</sub> and concentrated under reduced pressure. The residue was purified by silica gel using the eluent noted below to yield the desired product as a colourless oil (256 mg, 19 %); R<sub>f</sub> 0.64 (EtOAc:hexane, 9:1);  $\nu_{\text{max}}$  (liquid)/cm<sup>-1</sup> 3031 (Ar C-H), 2954, 2911, 2876 (C-H), 1602 (Ar C=C), 1237, 954 (SiOAr), 1004 (SiCH<sub>2</sub>CH<sub>3</sub>);  $\delta$ H (400 MHz, CDCl<sub>3</sub>) 0.71 – 0.77 (q, 6H, SiCH<sub>2</sub>CH<sub>3</sub>) 0.98 – 1.02 (t, 9H, SiCH<sub>2</sub>CH<sub>3</sub>) 2.29 (s, 3H, ArCH<sub>3</sub>) 6.64 – 6.67 (m, 2H, ArH) 6.75 (d, *J* = 7.6 Hz, 1 H, ArH) 7.09 (t, *J* = 7.8 Hz, 1 H, ArH); MS *m/z* (ES<sup>+</sup>) 223 (100 %, [M+H]<sup>+</sup>).

**Triethyl(*p*-methylphenoxy)silane** <sup>2</sup>. Chlorotriethylsilane (1 mL, 6.0 mmol) was added dropwise to a solution of *o*-cresol (643 mg, 6.0 mmol) and imidazole (811 mg, 11.8 mmol) in anhydrous acetonitrile (6 mL). The reaction mixture was stirred at room temperature for 16 h, after which diethyl ether (20 mL) was added and the organic phase washed with H<sub>2</sub>O (2 × 20 mL). The organic phase was then dried with MgSO<sub>4</sub> and concentrated under reduced pressure. The residue was purified by silica gel using the eluent noted below to yield the desired compound as a colourless oil (543 mg, 41%); R<sub>f</sub> 0.64 (EtOAc:hexane, 9:1);  $\nu_{\text{max}}$  (liquid)/cm<sup>-1</sup> 2953 (Ar C-H), 2090, 2875 (C-H), 1612 (Ar C=C), 1257, 1002, 942 (SiCH<sub>2</sub>CH<sub>3</sub>), 1235, 969 (SiOAr);  $\delta$ H (400 MHz, CDCl<sub>3</sub>) 0.69 – 0.76 (q, 6H, SiCH<sub>2</sub>CH<sub>3</sub>) 0.98 – 1.01 (m, 9H, SiCH<sub>2</sub>CH<sub>3</sub>) 2.27 (s, 3H, ArCH<sub>3</sub>) 6.74 (d, *J* = 8.4 Hz, 2H, ArH) 7.01 (d, *J* = 8.4 Hz, 2H, ArH); MS *m/z* (ES<sup>+</sup>) 223 (100 %, [M+H]<sup>+</sup>).

**Triethyl(*o*-methoxyphenoxy)silane** <sup>2</sup>. Chlorotriethylsilane (1.5 mL, 8.9 mmol) was added dropwise to a solution of *o*-methoxyphenol (990  $\mu$ L, 8.9 mmol) and imidazole (1200 mg, 17.6 mmol) in anhydrous DMF (9 mL). The reaction mixture was stirred at 80 °C for 72 h, after which diethyl ether (150 mL) was added and the organic phase washed with H<sub>2</sub>O (2 × 60 mL). The organic phase was then dried with MgSO<sub>4</sub> and concentrated under reduced pressure. The residue was purified by silica gel using the eluent noted below to yield the desired silyl ether as a colourless oil (1529 mg, 72 %); R<sub>f</sub> 0.49 (EtOAc:hexane, 1:40);  $\nu_{\text{max}}$  (liquid)/cm<sup>-1</sup> 2954, 2911, 2876, 2834 (C-H), 1455, 1439 (Ar

C=C), 1222, 1005, 974 (SiCH<sub>2</sub>CH<sub>3</sub>);  $\delta$ H (400 MHz, CDCl<sub>3</sub>) 0.69 – 0.76 (q, 6H,  $J$  = 8.0 Hz, SiCH<sub>2</sub>CH<sub>3</sub>) 0.97 – 1.01 (t, 9H,  $J$  = 8.0 Hz, SiCH<sub>2</sub>CH<sub>3</sub>) 3.81 (s, 3H, OCH<sub>3</sub>) 6.77 – 6.93 (m, 4H, ArH); MS  $m/z$  (ES<sup>+</sup>) 239 (100 %, [M+H]<sup>+</sup>).

**Triethyl(*m*-methoxyphenoxy)silane <sup>2</sup>.** Chlorotriethylsilane (1.5 mL, 8.9 mmol) was added dropwise to a solution of *m*-methoxyphenol (740 mg, 5.9 mmol) and imidazole (1200 mg, 17.82 mmol) in anhydrous DMF (9 mL). The reaction mixture was stirred at 80 °C for 72 h, after which diethyl ether (150 mL) was added and the organic phase washed with H<sub>2</sub>O (2 × 60 mL). The organic phase was then dried with MgSO<sub>4</sub> and concentrated under reduced pressure. The residue was purified by silica gel using the eluent noted below to yield the desired silyl ether as a colourless oil (1111 mg, 52 %);  $R_f$  0.56 (EtOAc:hexane, 1:5);  $\nu_{\max}$  (liquid)/cm<sup>-1</sup> 2955, 2912, 2877, 2834 (C-H), 1451, 1414 (Ar C=C), 1288, 1269, 1239, 973 (SiCH<sub>2</sub>CH<sub>3</sub>);  $\delta$ H (400 MHz, CDCl<sub>3</sub>) 0.72 – 0.78 (m, 6H, SiCH<sub>2</sub>CH<sub>3</sub>) 0.99 – 1.03 (m, 9H, SiCH<sub>2</sub>CH<sub>3</sub>) 3.78 (s, 3H, OCH<sub>3</sub>) 6.43 – 6.44 (t,  $J$  = 2.4 Hz, 1H, ArH) 6.46 – 6.48 (ddd,  $J$  = 8.0, 2.0, 0.8 Hz 1H, ArH) 6.5 – 6.54 (ddd,  $J$  = 8.2, 2.4, 0.8 Hz, 1H, ArH) 7.13 (t,  $J$  = 8.2 Hz, 1H, ArH); MS  $m/z$  (ES<sup>+</sup>) 239 (100 %, [M+H]<sup>+</sup>).

**Triethyl(*p*-methoxyphenoxy)silane <sup>2</sup>.** Chlorotriethylsilane (1.5 mL, 8.9 mmol) was added dropwise to a solution of *m*-methoxyphenol (740 mg, 5.9 mmol) and imidazole (1200 mg, 17.82 mmol) in anhydrous DMF (9 mL). The reaction mixture was stirred at 80 °C for 72 h, after which diethyl ether (150 mL) was added and the organic phase washed with H<sub>2</sub>O (2 × 60 mL). The organic phase was then dried with MgSO<sub>4</sub> and concentrated under reduced pressure. The residue was purified by silica gel using the eluent noted below to yield the desired product as a colourless oil (741 mg, 60 %);  $R_f$  0.50 (EtOAc:hexane, 1:5);  $\nu_{\max}$  (liquid)/cm<sup>-1</sup> 3042 (Ar C-H), 2954, 2911, 2877, 2833 (C-H), 1462, 1441 (Ar C=C), 1294, 1227, 1039 (Ar O-CH<sub>3</sub>), 1004, 975 (SiCH<sub>2</sub>CH<sub>3</sub>);  $\delta$ H (400 MHz, CDCl<sub>3</sub>) 0.68 – 0.74 (q, 6H, SiCH<sub>2</sub>CH<sub>3</sub>) 0.97 – 1.01 (t, 9H, SiCH<sub>2</sub>CH<sub>3</sub>) 3.76 (s, 3H, OCH<sub>3</sub>) 6.74 – 6.79 (m, 4H, ArH); MS  $m/z$  (ES<sup>+</sup>) 239 (100 %, [M+H]<sup>+</sup>).

**Triethyl(octyloxy)silane <sup>3</sup>.** To a solution of octanol (2.81 mL, 17.8 mmol) and imidazole (857 mg, 12.5 mmol) in anhydrous DMF (12 mL), chlorotriethylsilane (3 mL, 17.8 mmol) was added dropwise. The reaction mixture was stirred under N<sub>2</sub> at RT for 36 h, after which diethyl ether (300 mL) was added and the organic phase washed with H<sub>2</sub>O (2 × 60mL). The organic phase was dried with MgSO<sub>4</sub> and condensed under reduced pressure. The residue was purified by silica gel using the eluent noted below to yield the desired product as a colourless oil. (887 mg, 57 %),  $R_f$  0.33 (Hexane/EtOAc, 40:1),  $\nu_{\max}$  (liquid)/cm<sup>-1</sup> 2953, 2924, 2874, 2855 (C-H), 1237, 1097 (C-O), 1004 (C-H), 976 (SiCH<sub>2</sub>CH<sub>3</sub>);  $\delta$ H (400 MHz, CDCl<sub>3</sub>) 0.57 – 0.62 (q, 6H, SiCH<sub>2</sub>CH<sub>3</sub>) 0.86 – 0.90 (m, 3H, octyl CH<sub>3</sub>) 0.96 (t,  $J$  = 8.0 Hz, 9H, SiCH<sub>2</sub>CH<sub>3</sub>) 1.28 (m, 10 H, octyl CH<sub>2</sub>) 1.49 – 1.54 (m, 2H, octyl CH<sub>2</sub>) 3.59 (t,  $J$  = 6.8 Hz, 2H, CH<sub>2</sub>O); MS  $m/z$  (APCI) 245 (100%, [M+H]<sup>+</sup>).

***rac*-Triethyl(*E*-pent-3-en-2-yloxy)silane <sup>4</sup>.** Chlorotriethylsilane (195  $\mu$ L, 1.2 mmol) was added dropwise to a solution of *E*-3-penten-2-ol (90 mg, 1.1 mmol) and pyridine (100  $\mu$ L, 1.2 mmol) in anhydrous dichloromethane (12 mL) under N<sub>2</sub> at 0 °C. The reaction was stirred at RT for 4 h and saturated ammonium chloride (6 mL) was gradually added followed by DCM (30 mL). The organic

phase was washed with H<sub>2</sub>O (15 mL) and saturated aqueous NaCl (10 mL). The organic phase was dried with MgSO<sub>4</sub> and condensed under reduced pressure. The residue was purified by silica gel using the eluent noted below to yield the desired compound as a colourless oil (60 mg, 30 %); R<sub>f</sub> 0.68 (DCM:pentane, 2:3);  $\nu_{\text{max}}$  (liquid)/cm<sup>-1</sup> 2876 (C-H), 2954 (C-H), 1674 (C=C), 1081 (C-O), 992 (Si-O);  $\delta$ H (400 MHz, CDCl<sub>3</sub>) 0.52 (q, *J* = 7.8 Hz, 6H, SiCH<sub>2</sub>CH<sub>3</sub>), 0.95 – 0.81 (m, 9H, SiCH<sub>2</sub>CH<sub>3</sub>), 1.13 (d, *J* = 6.2 Hz, 3H, CH<sub>3</sub>CO), 1.59 (dt, *J* = 6.2, 1.0 Hz, 3H, CH<sub>3</sub>CH=), 4.22 – 4.10 (m, 1H, CHO), 5.57 – 5.34 (m, 2H, CH=); *m/z* (EI) 200 (17%, M<sup>+</sup>), 171 (100%, [M-Et]<sup>+</sup>).

**(R)-triethyl(octan-2-yloxy)silane** <sup>5</sup>. To a solution of (R)-2-octanol (2.8 mL, 17.8 mmol) and imidazole (1224 mg, 18.0 mmol) in anhydrous DMF (12 mL), chlorotriethylsilane (3 mL, 17.8 mmol) was added dropwise. The reaction mixture was stirred under N<sub>2</sub> at RT for 36 h after which diethyl ether (300 mL) was added and the organic phase washed with H<sub>2</sub>O (2 × 60mL). The organic phase was dried with MgSO<sub>4</sub> and condensed under reduced pressure. The residue was purified by silica gel using the eluent noted below to yield the desired product as a colourless oil (3180 mg, 73 %); R<sub>f</sub> 0.46 (Hexane/EtOAc, 40:1),  $\nu_{\text{max}}$  (liquid)/cm<sup>-1</sup> 2954, 2925, 2874, 2858 (C-H), 1050 (C-O), 1005 (SiCH<sub>2</sub>CH<sub>3</sub>);  $\delta$ H (400 MHz, CDCl<sub>3</sub>) 0.49 – 0.62 (m, 6H, SiCH<sub>2</sub>CH<sub>3</sub>) 0.87 – 0.90 (t, 3H, CH<sub>2</sub>CH<sub>3</sub>) 0.91 – 0.98 (m, 9H, SiCH<sub>2</sub>CH<sub>3</sub>) 1.13 (d, *J* = 6.4 Hz, 3H, CH<sub>3</sub>CO) 1.27 – 1.31 (m, 10H, CH) 3.75 – 3.79 (m, *J* = 6.0 Hz, 1H, CHO); MS *m/z* (APCI) 245 (100%, [M+H]<sup>+</sup>).

**(S)-triethyl(octan-2-yloxy)silane** <sup>6</sup>. To a solution of (S)-2-octanol (1 mL, 6.3 mmol) and imidazole (2420 mg, 35.5 mmol) in anhydrous DMF (8 mL), chlorotriethylsilane (1 mL, 6.3 mmol) was added dropwise. The reaction mixture was stirred under N<sub>2</sub> at RT for 36 h after which diethyl ether (150 mL) was added and the organic phase washed with H<sub>2</sub>O (2 × 50 mL). The organic phase was dried with MgSO<sub>4</sub> and condensed under reduced pressure. The residue was purified by silica gel using the eluent noted below to yield the desired compound as a colourless oil (887 mg, 58%); R<sub>f</sub> 0.46 (Hexane/EtOAc, 40:1),  $\nu_{\text{max}}$  (liquid)/cm<sup>-1</sup> 2955, 2924, 2874, 2858 (C-H), 1052 (C-O), 1005 (SiCH<sub>2</sub>CH<sub>3</sub>);  $\delta$ H (400 MHz, CDCl<sub>3</sub>) 0.49 – 0.62 (m, 6H, SiCH<sub>2</sub>CH<sub>3</sub>) 0.87 – 0.90 (t, 3H, CH<sub>2</sub>CH<sub>3</sub>) 0.91 – 0.98 (m, 9H, SiCH<sub>2</sub>CH<sub>3</sub>) 1.13 (d, *J* = 6.0 Hz, 3H, CH<sub>3</sub>CO) 1.27 – 1.31 (m, 10H, CH) 3.73 – 3.79 (m, *J* = 6.0 Hz, 1H, CHO); MS *m/z* (APCI) 245 (100%, [M+H]<sup>+</sup>).

**(R)-triethyl-(1-phenylethoxy)silane** <sup>6</sup>. To a solution (R)-1-phenylethan-1-ol (2.14 mL, 17.8 mmol) and imidazole (1000 mg, 14.7 mmol) in anhydrous DMF (6 mL), chlorotriethylsilane (1.2 mL, 7.1 mmol) was added dropwise. The reaction mixture was stirred at room temperature for 24 h, after which diethyl ether (150 mL) was added and the organic phase washed with water (2 × 60 mL). The organic phase was then dried with MgSO<sub>4</sub> and concentrated under reduced pressure. The residue was purified by silica gel using the eluent noted below to yield the desired compound as a colourless oil (1217 mg, 85.7%); R<sub>f</sub> 0.50 (Hexane/EtOAc, 5:1);  $\nu_{\text{max}}$  (liquid)/cm<sup>-1</sup> 3063, 3027 (Ar C-H), 2952, 2875 (C-H), 1492, 1452 (Ar C=C), 1237, 1002, 959 (SiCH<sub>2</sub>CH<sub>3</sub>), 1091, 1031 (C-O);  $\delta$ H (400 MHz, CDCl<sub>3</sub>) 0.53 – 0.59 (m, 6H, SiCH<sub>2</sub>CH<sub>3</sub>) 0.89 – 0.93 (t, 9H, SiCH<sub>2</sub>CH<sub>3</sub>) 1.43 (d, *J* = 6.4 Hz, 3H, CH<sub>3</sub>CO) 4.79 (q, *J* = 6.4 Hz, 1H, CHO) 7.20 – 7.24 (m, 1H, ArH) 7.28 – 7.35 (m, 4H, ArH); MS *m/z* (ES<sup>+</sup>) 237 (100 %, [M+H]<sup>+</sup>).

**S-triethyl(1-phenylethoxy)silane** <sup>6</sup>. To a solution of (S)-1-phenylethan-1-ol (2.14 mL, 17.8 mmol) and imidazole (1000 mg, 14.87 mmol) in anhydrous DMF (6 mL), chlorotriethylsilane (1.2 mL, 7.14 mmol) was added dropwise. The reaction mixture was stirred at room temperature for 24 h, after which diethyl ether (150 mL) was added and the organic phase washed with water (2 × 60 mL). The organic phase was then dried with MgSO<sub>4</sub> and concentrated under reduced pressure. The residue was purified by silica gel using the eluent noted below to yield the desired compound as a colourless oil (1147 mg, 80.8%); R<sub>f</sub> 0.50 (Hexane/EtOAc, 5:1);  $\nu_{\text{max}}$  (liquid)/cm<sup>-1</sup> 3063, 3027 (Ar C-H), 2953, 2875 (C-H), 1492, 1452 (Ar C=C), 1237, 1003, 954 (SiCH<sub>2</sub>CH<sub>3</sub>), 1091, 1031 (C-O);  $\delta$ H (400 MHz, CDCl<sub>3</sub>) 0.53 – 0.59 (m, 6H, SiCH<sub>2</sub>CH<sub>3</sub>), 0.89 – 0.93 (t, 9H, SiCH<sub>2</sub>CH<sub>3</sub>), 1.43 (d, *J* = 6.4 Hz, 3H, CH<sub>3</sub>CO) 4.84 – 4.89 (q, *J* = 6.4 Hz, 1H, CHO), 7.20 – 7.24 (m, 1H, ArH) 7.28 – 7.35 (m, 1H, ArH); MS *m/z* (ES<sup>+</sup>) 237 (100 %, [M+H]<sup>+</sup>).

## References for SI

1. B. N. Dolgov, Y. I. Khudobin and N. P. Kharitonov, *Bulletin of the Academy of Sciences of the USSR, Division of Chemical Science*, 1959, **8**, 1195-1200.
2. E. Åkerman, *Acta Chemica Scandinavica*, 1957, **11**, 373-381.
3. S. Y. Tabatabaei Dakhili, S. A. Caslin, A. S. Faponle, P. Quayle, S. P. de Visser and L. S. Wong, *Proceedings of the National Academy of Sciences*, 2017, **114**, E5285-E5291.
4. E. V. Nekhorosheva and V. M. Al'bitskaya, *Zhurnal Obshchei Khimii*, 1968, **38**, 1511-1517.
5. R. M. Denton, J. An, B. Adeniran, A. J. Blake, W. Lewis and A. M. Poulton, *Journal of Organic Chemistry*, 2011, **76**, 6749-6767.
6. Y. Onishi, Y. Nishimoto, M. Yasuda and A. Baba, *Organic Letters*, 2011, **13**, 2762-2765
